# Supplementary material for: Competitive crystallization, in situ separation and solidification mechanism of Cr-spinel crystal from Cr-bearing slag
Source: Royal Society of Chemistry journal article supplement (doi:10.1039/d2ce01543a), 2023-01-01
Supplement: d2ce01543a1.pdf [file d2ce01543a1.pdf]

## **Supporting Information**

### **Competitive Crystallization, In-Situ Separation and Solidification Mechanism of Cr-Spinel Crystal from Cr- bearing Slag**

**Yu Li, Jintao Gao\*, Xi Lan, Guoliang Feng, Yanling Zhang and Zhancheng**

**Guo\***

State Key Laboratory of Advanced Metallurgy, University of Science and Technology

Beijing, 100083 Beijing, P.R. China.

Corresponding author: \*Jintao Gao, \*Zhancheng Guo

E-mail: Jintao Gao: [jintaogao@ustb.edu.cn](mailto:jintaogao@ustb.edu.cn)

Zhancheng Guo: [zcguo@ustb.edu.cn](mailto:zcguo@ustb.edu.cn)

Tel.: +86 010 82377750

Fax.: +86 010 82375042

The recovery ratio of Cr in the Cr-spinel crystals was calculated via **Eq. (1)**.

$$R_{Cr} = \frac{m_{Cr} \times \omega_{Cr}}{m_{Cr} \times \omega_{Cr} + m_s \times \omega_s} \times 100\% \quad (1)$$

where,  $R_{Cr}$  is the recovery ratio of Cr in Cr-spinel crystals,  $\omega_{Cr}$  and  $\omega_s$  are the mass fractions of  $Cr_2O_3$  in Cr-spinel crystals and slag phase,  $m_{Cr}$  and  $m_s$  are the masses of them, respectively.

The recovery ratio and the mass fraction of Cr in Cr-spinel crystals compared to the slag phase separated from Cr-bearing slag with various FeO and MnO content is shown in **Fig. S1**.

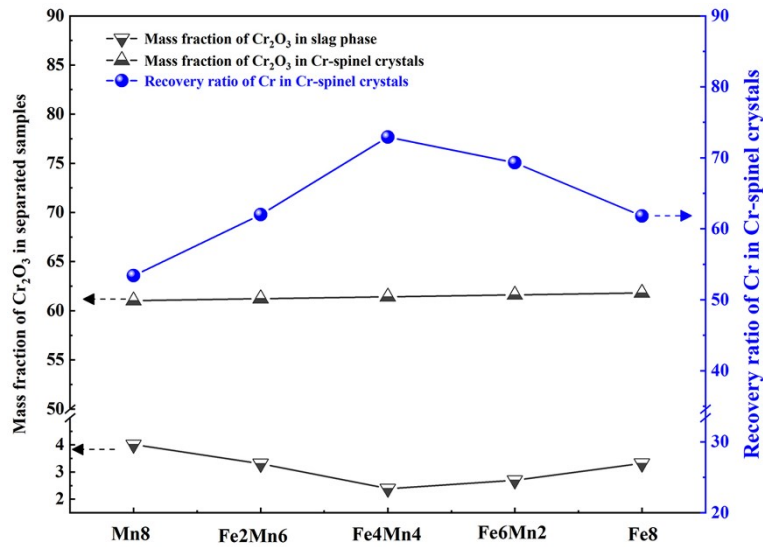

**Fig. S1** Recovery ratio and mass fraction of Cr in Cr-spinel crystals compared to slag phase separated from Cr-bearing slag.
